# Supplementary material for: Alcohol Drinking Pattern and Risk of Head and Neck Cancer: A Nationwide Cohort Study
Source: MDPI journal article supplement (doi:10.3390/ijerph182111204), 2021-10-25
Supplement: s1 [file s1]

**Supplementary Table S1. Risk of head & neck cancer stratified by average alcohol consumption: Impact of drinking frequency versus daily amount.**

|                                                   |     | No.       | Event<br>Number | Person-years<br>(PYs) | Incidence Rate<br>(per 1000 PYs) | Model 1<br>HR (95% CI)  | Model 2<br>HR (95% CI)  |
|---------------------------------------------------|-----|-----------|-----------------|-----------------------|----------------------------------|-------------------------|-------------------------|
| <b>Drinking frequency (days per week)</b>         |     |           |                 |                       |                                  |                         |                         |
| Non-drinker                                       | 0   | 7,010,332 | 7,503           | 47,804,729.9          | 0.16                             | 1 (ref.)                | 1 (ref.)                |
| Mild drinker                                      | 1-2 | 2,478,062 | 3,007           | 17,009,926.3          | 0.18                             | 1.01 (0.96-1.05)        | 0.98 (0.94-1.02)        |
|                                                   | 3-4 | 262,156   | 628             | 1,778,467.8           | 0.35                             | <b>1.37 (1.27-1.49)</b> | <b>1.29 (1.18-1.40)</b> |
|                                                   | 5-7 | 41,244    | 111             | 273,515.8             | 0.41                             | 1.17 (0.97-1.41)        | 1.10 (0.91-1.33)        |
| Moderate drinker                                  | 1-2 | 547,950   | 867             | 3,764,429.3           | 0.23                             | <b>1.24 (1.15-1.33)</b> | <b>1.13 (1.05-1.21)</b> |
|                                                   | 3-4 | 438,236   | 1,022           | 2,992,517.7           | 0.34                             | <b>1.56 (1.46-1.67)</b> | <b>1.37 (1.28-1.47)</b> |
|                                                   | 5-7 | 126,852   | 410             | 849,812.9             | 0.48                             | <b>1.49 (1.35-1.65)</b> | <b>1.32 (1.19-1.46)</b> |
| Heavy drinker                                     | 1-2 | 95,867    | 140             | 659,969.6             | 0.21                             | <b>1.19 (1.01-1.41)</b> | 1.07 (0.90-1.27)        |
|                                                   | 3-4 | 359,487   | 723             | 2,457,728.6           | 0.29                             | <b>1.52 (1.41-1.65)</b> | <b>1.32 (1.22-1.43)</b> |
|                                                   | 5-7 | 377,281   | 1,421           | 2,541,035.0           | 0.56                             | <b>1.95 (1.83-2.06)</b> | <b>1.60 (1.51-1.70)</b> |
| <b>Daily amount (standard units per occasion)</b> |     |           |                 |                       |                                  |                         |                         |
| Non-drinker                                       | 0   | 7,010,332 | 7,503           | 47,804,729.9          | 0.16                             | 1 (ref.)                | 1 (ref.)                |
| Mild drinker                                      | 1-2 | 807,489   | 992             | 5,512,028.7           | 0.18                             | 0.97 (0.91-1.04)        | 0.97 (0.91-1.04)        |
|                                                   | 3-4 | 1,033,278 | 1,580           | 7,084,294.9           | 0.22                             | <b>1.15 (1.09-1.22)</b> | <b>1.10 (1.04-1.17)</b> |
|                                                   | 5-7 | 740,175   | 960             | 5,082,401.4           | 0.19                             | 1.06 (0.99-1.14)        | 1.00 (0.93-1.07)        |
|                                                   | ≥ 8 | 200,520   | 214             | 1,383,184.8           | 0.15                             | 0.94 (0.82-1.08)        | 0.88 (0.77-1.01)        |
| Moderate drinker                                  | 1-2 | 19,591    | 63              | 129,237.1             | 0.49                             | 1.27 (0.99-1.62)        | 1.16 (0.91-1.49)        |
|                                                   | 3-4 | 104,558   | 350             | 702,712.6             | 0.50                             | <b>1.55 (1.39-1.72)</b> | <b>1.36 (1.22-1.52)</b> |
|                                                   | 5-7 | 623,044   | 1,335           | 4,256,197.7           | 0.31                             | <b>1.48 (1.39-1.58)</b> | <b>1.31 (1.23-1.39)</b> |
|                                                   | ≥ 8 | 365,845   | 551             | 2,518,612.5           | 0.22                             | <b>1.25 (1.14-1.37)</b> | <b>1.13 (1.03-1.23)</b> |
| Heavy drinker                                     | 3-4 | 17,995    | 76              | 119,922.9             | 0.63                             | <b>1.66 (1.33-2.08)</b> | <b>1.42 (1.13-1.78)</b> |
|                                                   | 5-7 | 259,019   | 945             | 1,746,161.2           | 0.54                             | <b>1.88 (1.75-2.01)</b> | <b>1.55 (1.45-1.67)</b> |
|                                                   | ≥ 8 | 555,621   | 1,263           | 3,792,649.2           | 0.33                             | <b>1.65 (1.55-1.75)</b> | <b>1.41 (1.32-1.50)</b> |

Model 1: adjusted for age and sex

Model 2: adjusted for age, sex, income, smoking status, physical activity, body mass index, and diabetes mellitus

Abbreviations: HR, hazard ratio; CI, confidence interval
