# Supplementary material for: Alcohol Drinking Pattern and Risk of Head and Neck Cancer: A Nationwide Cohort Study
Source: MDPI journal article supplement (doi:10.3390/ijerph182111204), 2021-10-25
Supplement: s1 [file s1]

**Supplementary Table S2. Risks of head & neck cancer subtypes stratified by average alcohol consumption: Impact of drinking frequency versus daily amount.**

|                                            |     | Cancer Subtype          |                         |                         |                         |
|--------------------------------------------|-----|-------------------------|-------------------------|-------------------------|-------------------------|
|                                            |     | Oral Cavity             | Pharynx                 | Larynx                  | Salivary Gland          |
| Drinking frequency (days per week)         |     |                         |                         |                         |                         |
| Non-drinker                                | 0   | 1 (ref.)                | 1 (ref.)                | 1 (ref.)                | 1 (ref.)                |
| Mild drinker                               | 1-2 | 1.02 (0.94-1.12)        | 0.95 (0.89-1.03)        | 0.95 (0.87-1.03)        | 0.94 (0.83-1.07)        |
|                                            | 3-4 | <b>1.39 (1.18-1.64)</b> | <b>1.17 (1.02-1.35)</b> | <b>1.26 (1.10-1.45)</b> | <b>1.31 (1.02-1.69)</b> |
|                                            | 5-7 | 1.37 (0.97-1.95)        | 0.89 (0.63-1.26)        | 1.01 (0.75-1.38)        | 1.19 (0.65-2.15)        |
| Moderate drinker                           | 1-2 | <b>1.29 (1.11-1.49)</b> | 1.08 (0.96-1.22)        | <b>1.17 (1.03-1.33)</b> | 0.90 (0.71-1.15)        |
|                                            | 3-4 | <b>1.39 (1.21-1.61)</b> | <b>1.41 (1.26-1.57)</b> | <b>1.49 (1.33-1.67)</b> | 1.04 (0.82-1.31)        |
|                                            | 5-7 | <b>1.38 (1.12-1.70)</b> | <b>1.38 (1.17-1.62)</b> | <b>1.32 (1.13-1.55)</b> | 0.85 (0.57-1.28)        |
| Heavy drinker                              | 1-2 | 1.22 (0.86-1.68)        | 0.79 (0.58-1.08)        | 1.23 (0.92-1.63)        | 1.29 (0.82-2.01)        |
|                                            | 3-4 | <b>1.23 (1.04-1.47)</b> | <b>1.38 (1.21-1.56)</b> | <b>1.48 (1.29-1.69)</b> | 1.19 (0.93-1.53)        |
|                                            | 5-7 | <b>1.62 (1.42-1.84)</b> | <b>1.70 (1.54-1.87)</b> | <b>1.74 (1.58-1.91)</b> | 1.09 (0.87-1.37)        |
| Daily amount (standard units per occasion) |     |                         |                         |                         |                         |
| Non-drinker                                | 0   | 1(ref.)                 | 1(ref.)                 | 1(ref.)                 | 1(ref.)                 |
| Mild drinker                               | 1-2 | 1.01 (0.89-1.15)        | 0.92 (0.82-1.03)        | 0.94 (0.83-1.06)        | 0.97 (0.81-1.17)        |
|                                            | 3-4 | <b>1.24 (1.11-1.38)</b> | 1.04 (0.95-1.14)        | 1.03 (0.93-1.14)        | 1.05 (0.89-1.24)        |
|                                            | 5-7 | 0.95 (0.82-1.10)        | 1.02 (0.91-1.14)        | 1.07 (0.95-1.21)        | 0.87 (0.71-1.08)        |
|                                            | ≥ 8 | 0.92 (0.70-1.22)        | 0.80 (0.64-1.01)        | 0.88 (0.68-1.13)        | 1.10 (0.77-1.56)        |
| Moderate drinker                           | 1-2 | 0.98 (0.55-1.72)        | <b>1.57 (1.10-2.23)</b> | 1.10 (0.75-1.62)        | 1.71 (0.85-3.44)        |
|                                            | 3-4 | <b>1.57 (1.26-1.94)</b> | <b>1.35 (1.13-1.61)</b> | <b>1.36 (1.15-1.62)</b> | 0.99 (0.65-1.50)        |
|                                            | 5-7 | <b>1.32 (1.16-1.50)</b> | <b>1.29 (1.16-1.42)</b> | <b>1.47 (1.33-1.62)</b> | 1.02 (0.83-1.25)        |
|                                            | ≥ 8 | <b>1.32 (1.11-1.57)</b> | <b>1.17 (1.01-1.35)</b> | 1.09 (0.93-1.28)        | <b>0.71 (0.52-0.98)</b> |
| Heavy drinker                              | 3-4 | <b>2.07 (1.38-3.11)</b> | <b>1.52 (1.06-2.18)</b> | 1.15 (0.78-1.68)        | 1.35 (0.61-3.03)        |
|                                            | 5-7 | <b>1.41 (1.20-1.65)</b> | <b>1.59 (1.42-1.78)</b> | <b>1.66 (1.49-1.86)</b> | 1.22 (0.95-1.58)        |
|                                            | ≥ 8 | <b>1.43 (1.25-1.63)</b> | <b>1.46 (1.32-1.62)</b> | <b>1.65 (1.48-1.83)</b> | 1.09 (0.88-1.34)        |

Hazard ratios are adjusted for age, sex, income, smoking status, physical activity, body mass index, and diabetes mellitus.
